# Supplementary material for: A lignin-based biocomposite hydrogel for antimicrobial and wound healing applications
Source: Royal Society of Chemistry journal article supplement (doi:10.1039/d4ma00680a), 2024-01-01
Supplement: d4ma00680a1.pdf [file d4ma00680a1.pdf]

## Supplementary information

# Lignin-based biocomposite hydrogel for antimicrobial and wound healing applications

Jaskiran Preet,<sup>1,#</sup> Khushboo Pathania,<sup>1,#</sup> Jasdeep Kaur,<sup>2</sup> Rachna Singh,<sup>2</sup> Deepak B. Salunke,<sup>3,4</sup>

Sandip V. Pawar<sup>1\*</sup>

<sup>1</sup>University Institute of Pharmaceutical Sciences, Panjab University, Chandigarh 160 014, India

<sup>2</sup>Department of Microbial Biotechnology, Panjab University, Chandigarh 160 014, India

<sup>3</sup>Department of Chemistry and Centre for Advanced Studies, Panjab University, Chandigarh 160  
014, India

<sup>4</sup>National Interdisciplinary Centre of Vaccines, Immunotherapeutics and Antimicrobials, Panjab  
University, Chandigarh, 160 014, India

#Authors contributed equally

Corresponding author: Dr. Sandip V. Pawar,

Email: [pawars@pu.ac.in](mailto:pawars@pu.ac.in)

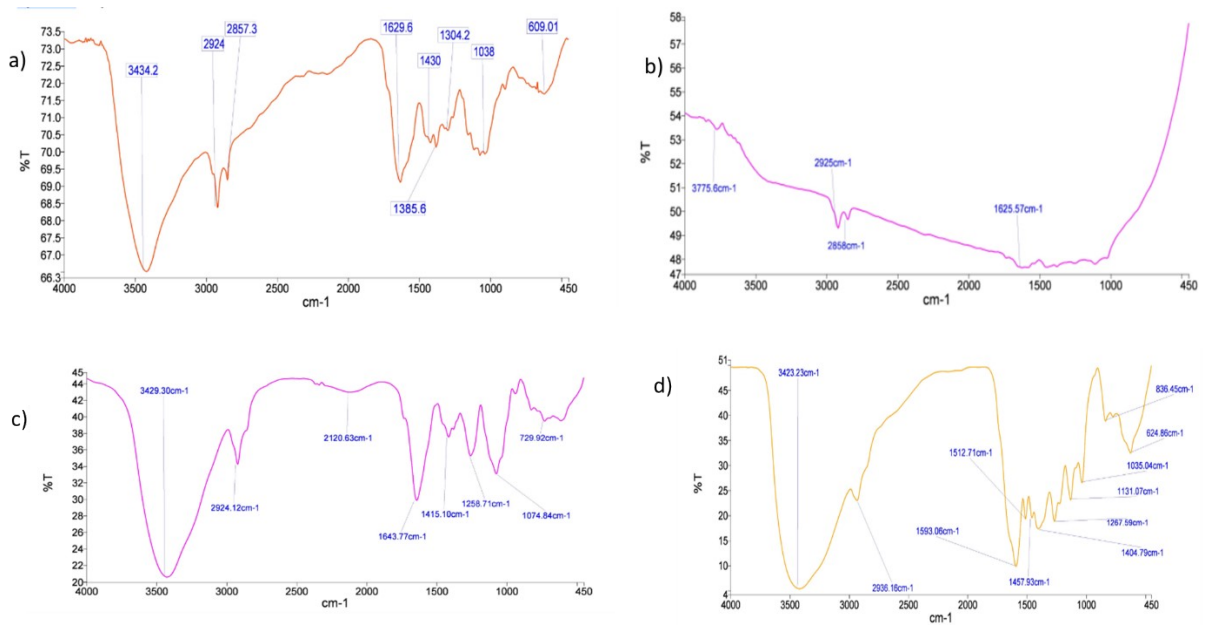

**Fig. 1** FTIR graph of a) Chitosan b) PVA c) CS (Chondroitin Sulphate) d) Lignin

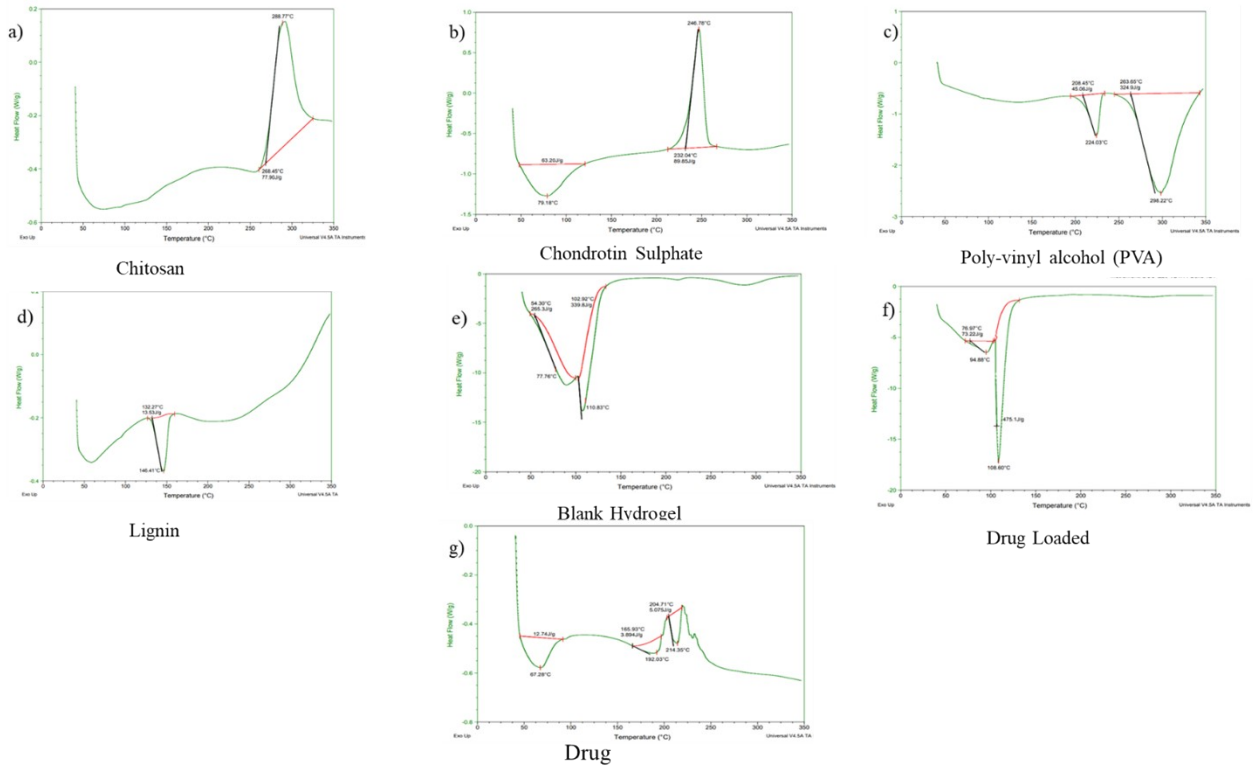

**Fig. 2** DSC graphs

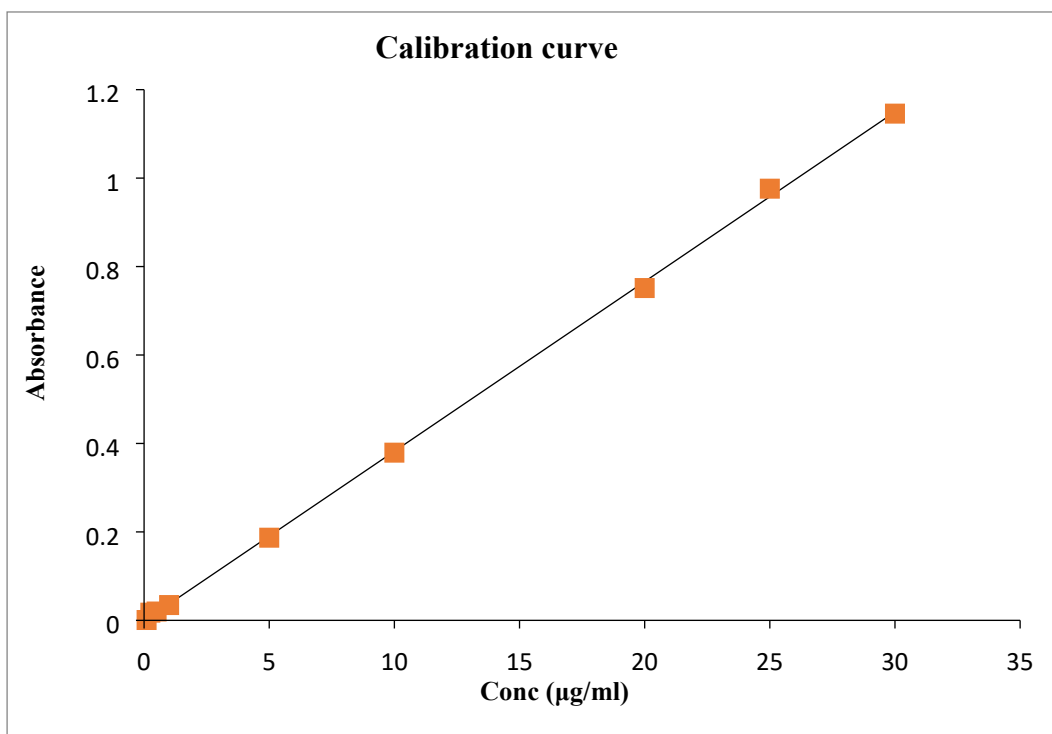

**Fig.3** Calibration curve of oxytetracycline

**Table 1.** Observed pH value of blank and drug-loaded hydrogel.

| S. No | Formulation                   | pH of water used | pH after 24 hours |
|-------|-------------------------------|------------------|-------------------|
| 1     | Blank Hydrogel                | 7.00             | 5.23              |
| 2     | Drug-loaded Hydrogel (100 mg) |                  | 4.74              |
| 3     | Drug-loaded Hydrogel (200 mg) |                  | 4.53              |
| 4     | Drug-loaded Hydrogel (300 mg) |                  | 4.35              |
| 5     | Drug solution (1 mg/mL)       |                  | 3.97              |
